# Supplementary material for: The mode and tempo of genome size evolution in eukaryotes
Source: HighWire-hosted journal article supplement (doi:10.1101/gr.6096207), 2007-04-09
Supplement: Supplementary_Figure_1_v2.pdf [file Supplementary_Figure_1_v2.pdf]

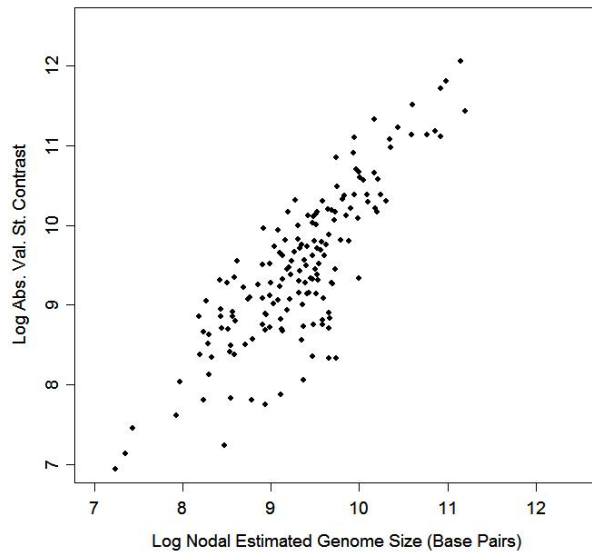

Supplementary Figure 1: A tree-wise analysis of the nodal estimated genome size and the calculated contrast at each node from a chronogram estimated from the 18S rDNA tree. Even with the estimated chronogram, as genome size increases, the rate of evolution of genome size increases (shown on  $\text{Log}_{10}$  axes for plotting purposes).
