# Supplementary material for: The mode and tempo of genome size evolution in eukaryotes
Source: HighWire-hosted journal article supplement (doi:10.1101/gr.6096207), 2007-04-09
Supplement: Supplementary_Figure_2_v2.pdf [file Supplementary_Figure_2_v2.pdf]

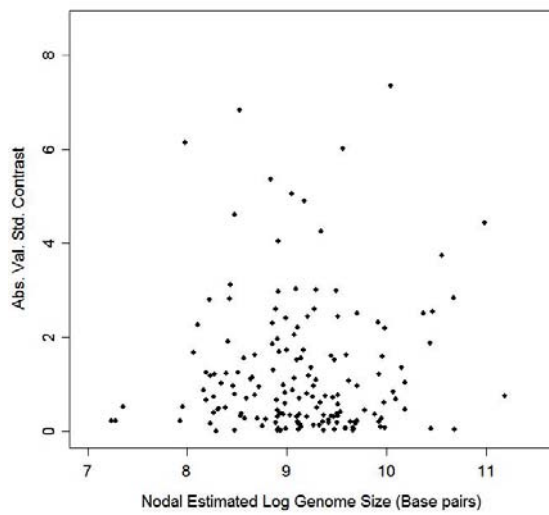

Supplementary Figure 2: A priori  $\text{Log}_{10}$  transformation of genome size removes the proportional effect of genome size on the rate of genome size evolution, even when a chronogram estimated from the 18S rDNA tree is used for the contrast calculation.
